# Supplementary material for: Porous cobalt–manganese oxide nanocubes derived from metal organic frameworks as a cathode catalyst for rechargeable Li–O2 batteries
Source: Royal Society of Chemistry journal article supplement (doi:10.1039/c4nr05865h), 2014-11-10
Supplement: c4nr05865h1.pdf [file c4nr05865h1.pdf]

## Supporting information

### Porous Cobalt-Manganese Oxide Nanocubes Derived from Metal Organic Frameworks as Cathode Catalysts for Rechargeable Li-O<sub>2</sub> Batteries

Jian Zhang,<sup>ab</sup> Liangjun Wang,<sup>c</sup> Leilei Xu,<sup>b</sup> Xiaoming Ge,<sup>d</sup> Xiao Zhao,<sup>b</sup> Min Lai,<sup>a</sup> Zhaolin Liu,<sup>d\*</sup> and Wei Chen<sup>bce\*</sup>

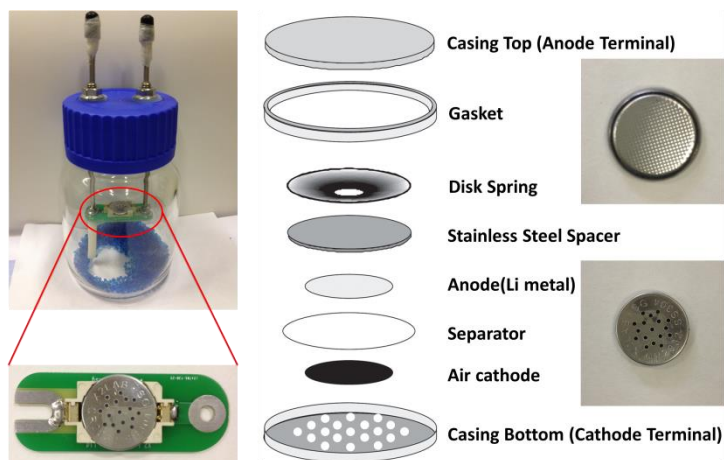

Fig. S1 Photographic images of the Li-O<sub>2</sub> battery system and schematic of modified coin cell

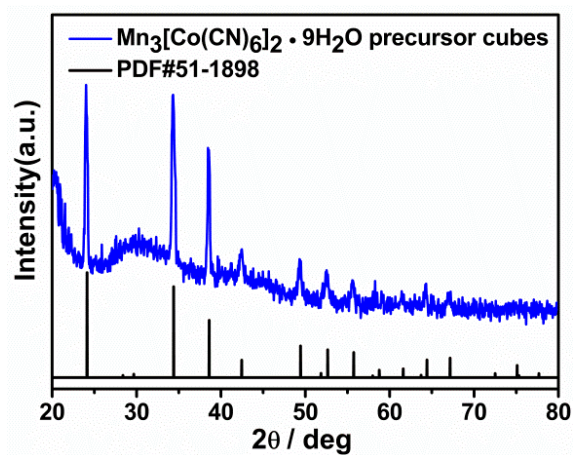

Fig. S2 The XRD pattern of Mn<sub>3</sub>[Co(CN)<sub>6</sub>]<sub>2</sub>·9H<sub>2</sub>O precursors

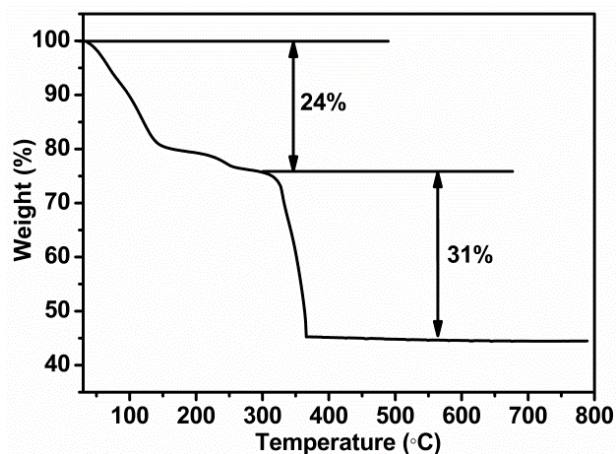

Fig. S3 Thermogravimetry (TG) of  $\text{Mn}_3[\text{Co}(\text{CN})_6]_2 \cdot 9\text{H}_2\text{O}$  precursors

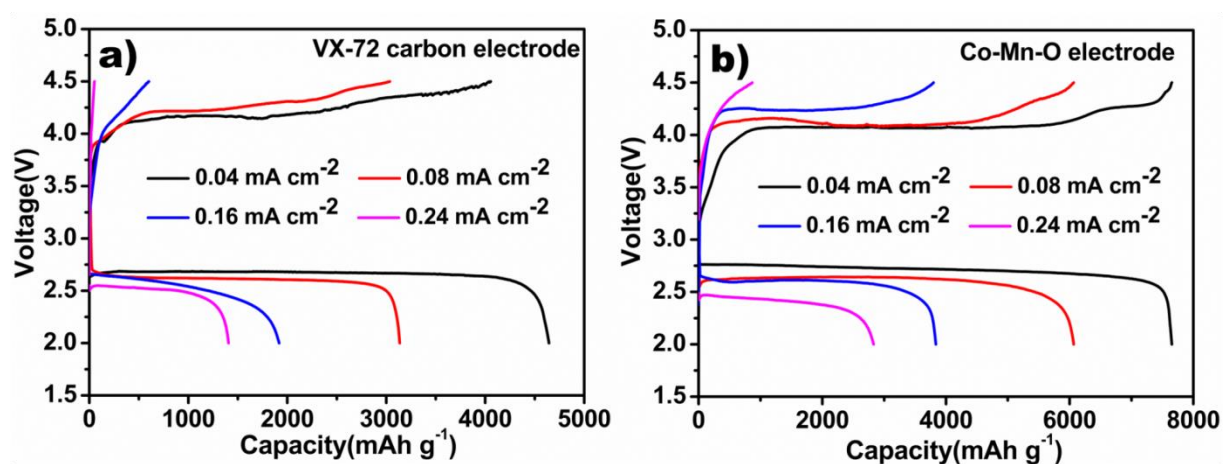

Fig. S4 First discharge-charge curves of  $\text{Li-O}_2$  batteries with (a) VX-72 carbon and (b) porous Co-Mn-O nanocubes electrodes at various current densities.

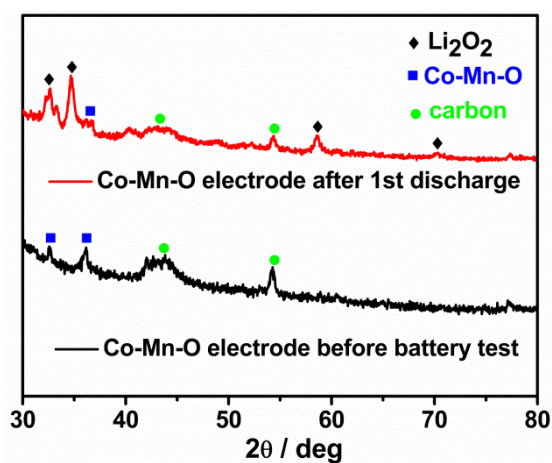

Fig. S5 XRD pattern of porous Co-Mn-O electrode before and after 1<sup>st</sup> discharge
